# Supplementary material for: In situ study on the charge/discharge of nanocrystalline Li2C2 as a new cathode material
Source: Royal Society of Chemistry journal article supplement (doi:10.1039/c6ra08990a), 2016-01-01
Supplement: c6ra08990a2.pdf [file c6ra08990a2.pdf]

## Supporting Online Information

### **In situ study on charge/discharge of nanocrystalline $\text{Li}_2\text{C}_2$ as a new cathode material**

Yurong Li, Xiaoyan Song \*, Fawei Tang, Chaohou, Jiangtao He, Haibin Wang, Xuemei Liu  
College of Materials Science and Engineering, Key Laboratory of Advanced Functional Materials,  
Education Ministry of China, Beijing University of Technology, Beijing 100124, China

\* To whom correspondence should be addressed. E-mail: xysong@bjut.edu.cn

#### **Series title:**

- A. Alloy microstructure characterization**
- B. Movie of in situ TEM observations of discharge/charge processes**
- C. SAED analysis of the microstructure after first charge**
- D. Morphology images of the electrode after different cycles**

### A. Alloy microstructure characterization

After the nanocrystalline  $\text{Li}_2\text{C}_2$  alloy bulk was prepared at College of Materials Science and Engineering, Beijing University of Technology, China, the preparation of the TEM film and microstructure characterization of the nanocrystalline  $\text{Li}_2\text{C}_2$  alloy were then performed at Friedrich Schiller University, Otto Schott Institute of Materials Research, Germany. As the high resolution TEM image shown in Fig. S1, the prepared nanocrystalline  $\text{Li}_2\text{C}_2$  alloy has a nanograin structure. The main phase is  $\text{Li}_2\text{C}_2$ , as indicated by the SAED pattern. It is seen that some amorphous structure is coexisting with the nanograins, which is caused in the process of TEM film preparation using the FIB technique.

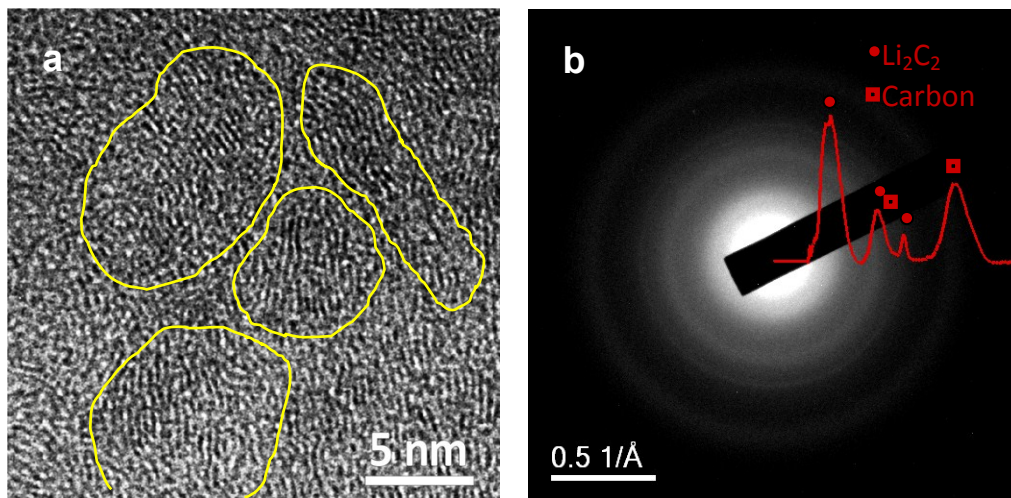

Fig. S1. (a) high resolution TEM image of the prepared nanocrystalline  $\text{Li}_2\text{C}_2$  alloy, (b) the selected area electron diffraction pattern and indexing.

### B. Movie of in situ TEM observations of discharge/charge processes

The movie recording the dynamic observations of discharge/charge processes is uploaded with our manuscript. It shows the details of the changes in the nanocrystalline  $\text{Li}_2\text{C}_2$  cathode during the cycling of discharge and charge processes, using the in situ TEM observations.

To reduce the document size of the movie, the rate for playing was sped up for 13 times.

### C. SAED analysis of the microstructure after first charge

To investigate the change of the  $\text{Li}_2\text{C}_2$  structure after the first delithiation, we made the SAED pattern of the microstructure, as shown in Fig. S2. Based on the lattice structure (as shown in Figure 5 in our manuscript), we simulated the XRD patterns of  $\text{LiC}_2$  and  $\text{Li}_{0.5}\text{C}_2$ , as shown in Fig. S3. The indexing of the SAED pattern shows that the diffraction planes are consistent with those in the XRD pattern of  $\text{LiC}_2$ . It is confirmed that in the in situ TEM test after the first charge the phase

is still  $\text{LiC}_2$ . This result also agrees with the first-principle calculations in Section 3.2 of our manuscript.

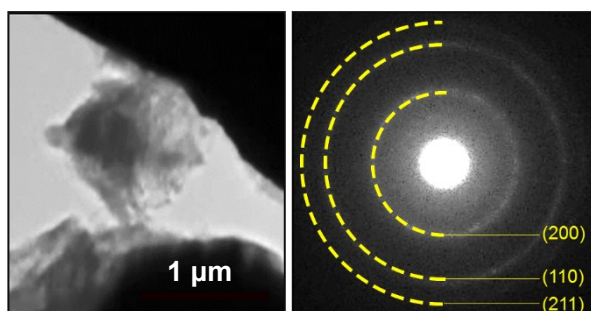

Fig. S2 The microstructure and SAED pattern of the nanocrystalline  $\text{Li}_2\text{C}_2$  particle after first charge process.

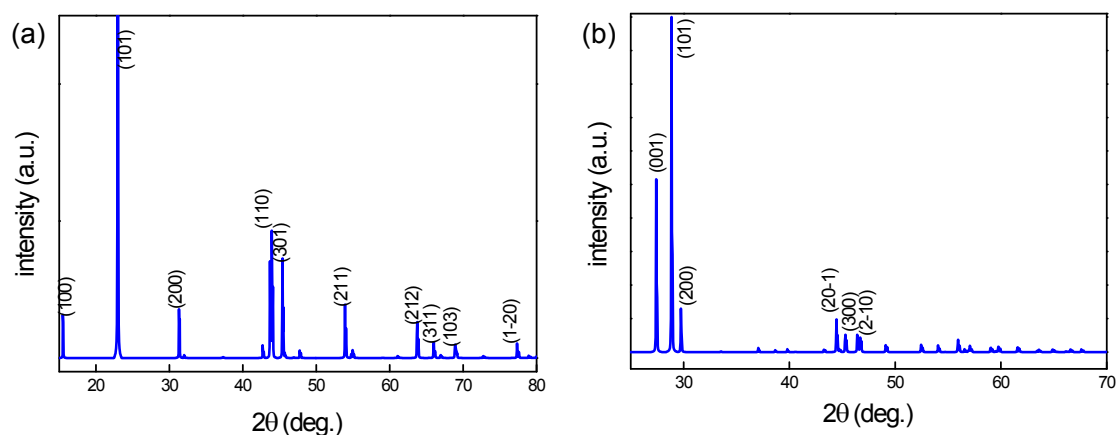

Fig. S3 The simulated XRD patterns of  $\text{LiC}_2$  (a) and  $\text{Li}_{0.5}\text{C}_2$  (b).

#### D. Morphology images of the electrode after different cycles

The Scan electron microscope images of the electrodes after different cycles are shown in Fig. S4. After 10 cycles (Fig. S4 (b)), holes appear in the electrode, as indicated by the arrows. The capacity of the nanocrystalline  $\text{Li}_2\text{C}_2$  decreases by 2.8% of the initial capacity, and there is slight change in the structure. After 20 cycles, there is a little increase of the holes in the electrode, as shown in Fig. S4 (c). As a result, there is a quick decrease of the capacity of the nanocrystalline  $\text{Li}_2\text{C}_2$ . After 50 cycles, some cracks and holes can be clearly seen at the surface of the electrode (Fig. S4 (d)), which causes further decrease of the lithium storage capacity. These results are consistent with the electrochemical tests. The discharge capacity of  $172 \text{ mAhg}^{-1}$  after 50 cycles indicates that the nanocrystalline  $\text{Li}_2\text{C}_2$  has important potential as a cathode material for lithium ion batteries.

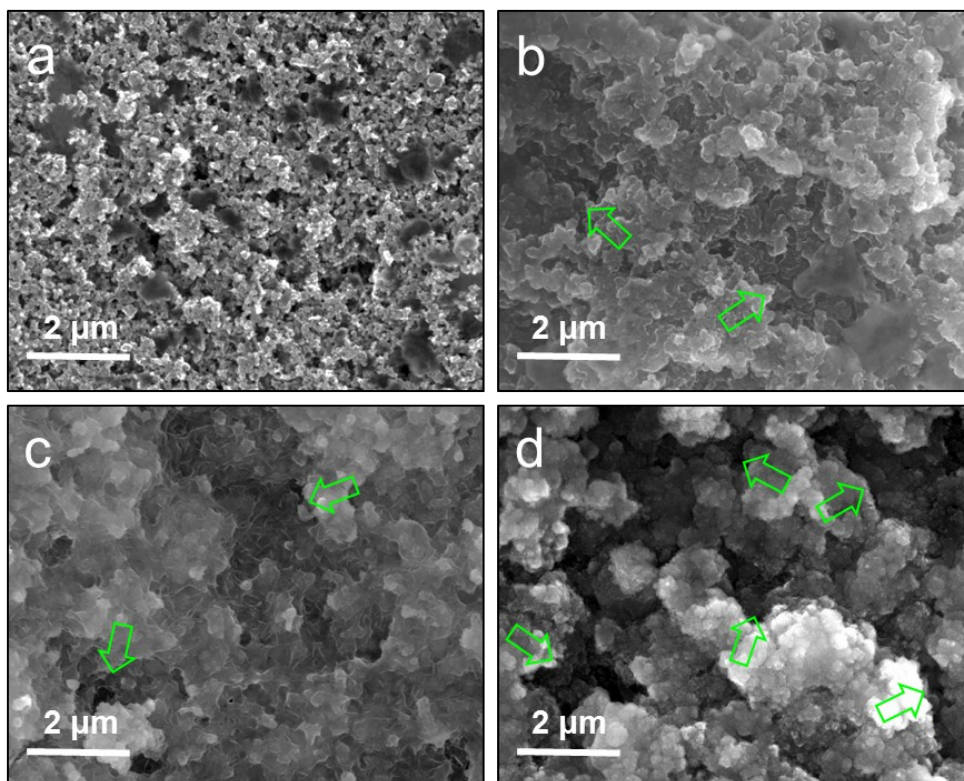

Fig. S4 SEM images of the nanocrystalline  $\text{Li}_2\text{C}_2$  electrodes after different cycles:  
(a) 0 cycle, (b) 10 cycles, (c) 20 cycles, (d) 50 cycles.
